# Supplementary material for: Increased epicardial adipose tissue thickness is a predictor of new-onset diabetes mellitus in patients with coronary artery disease treated with high-intensity statins
Source: Springer Nature journal article supplement (doi:10.1186/s12933-017-0650-3), 2018-01-11

# Figure S1

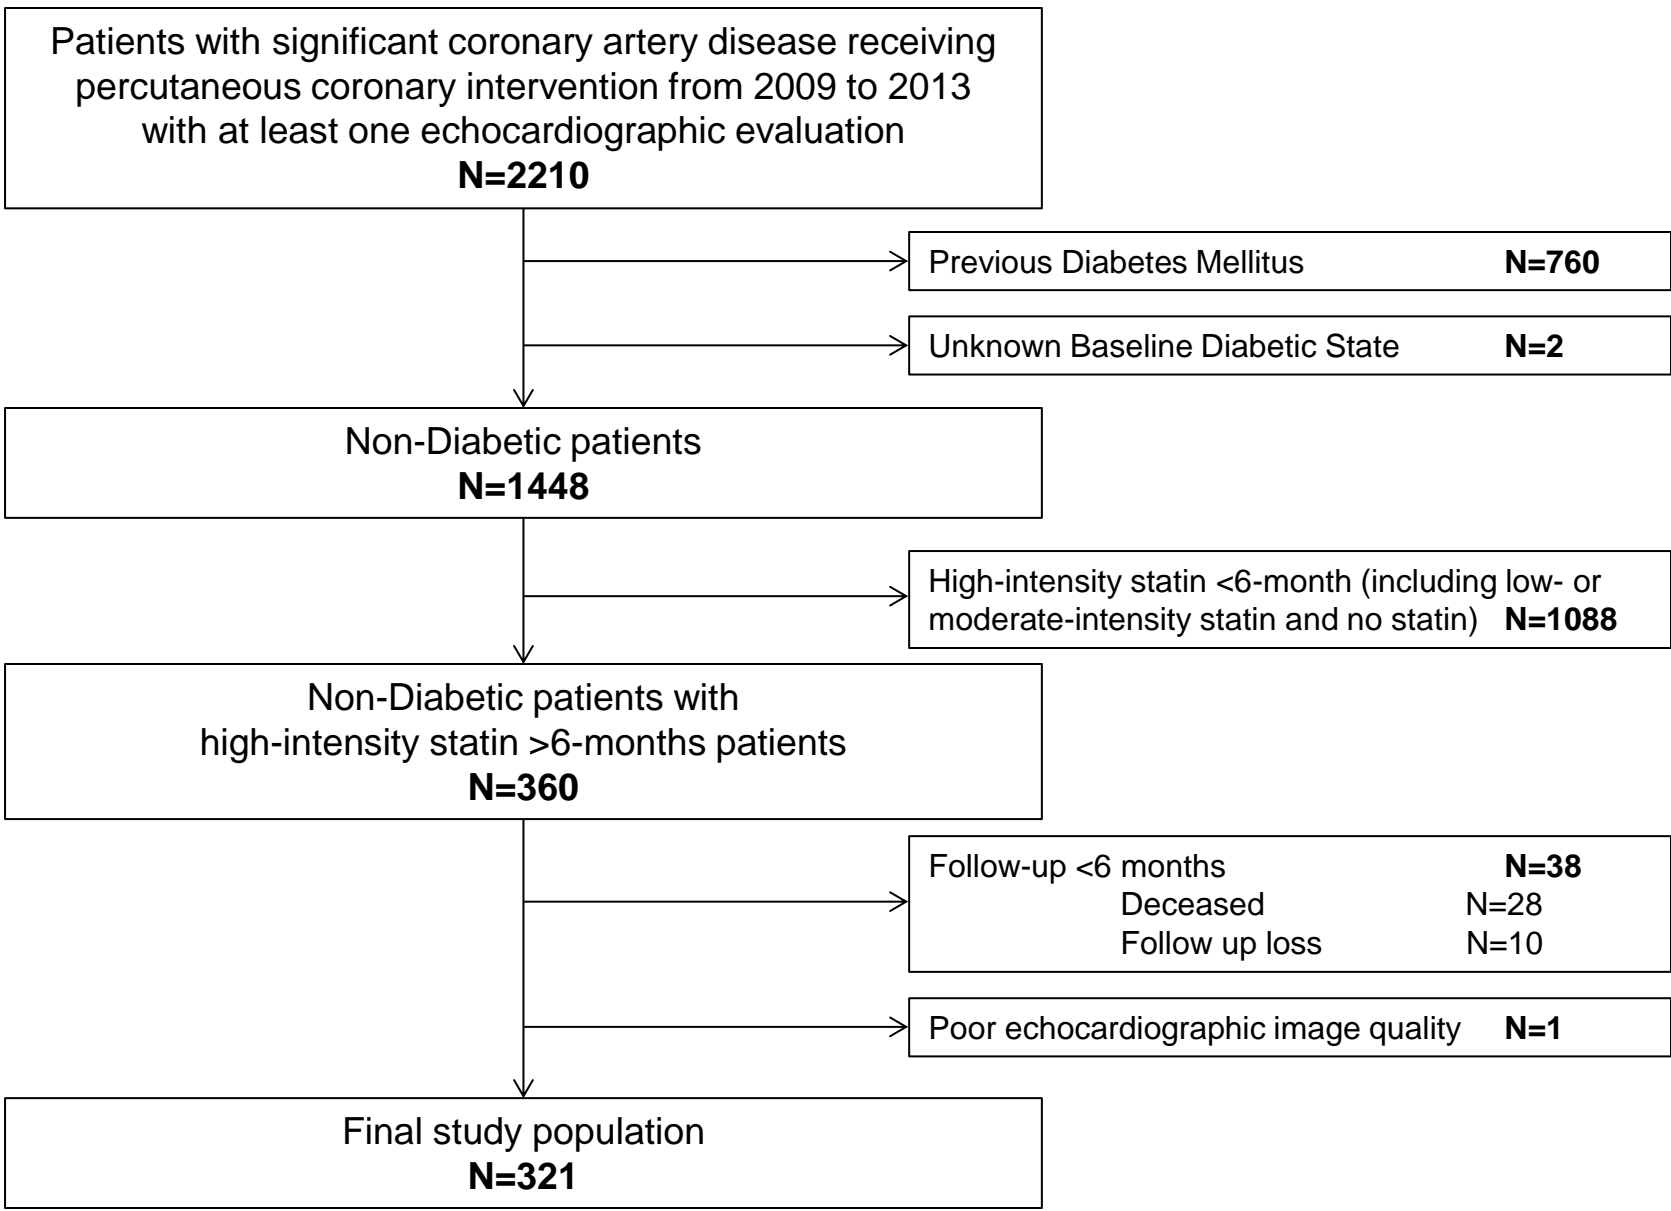

Figure S2

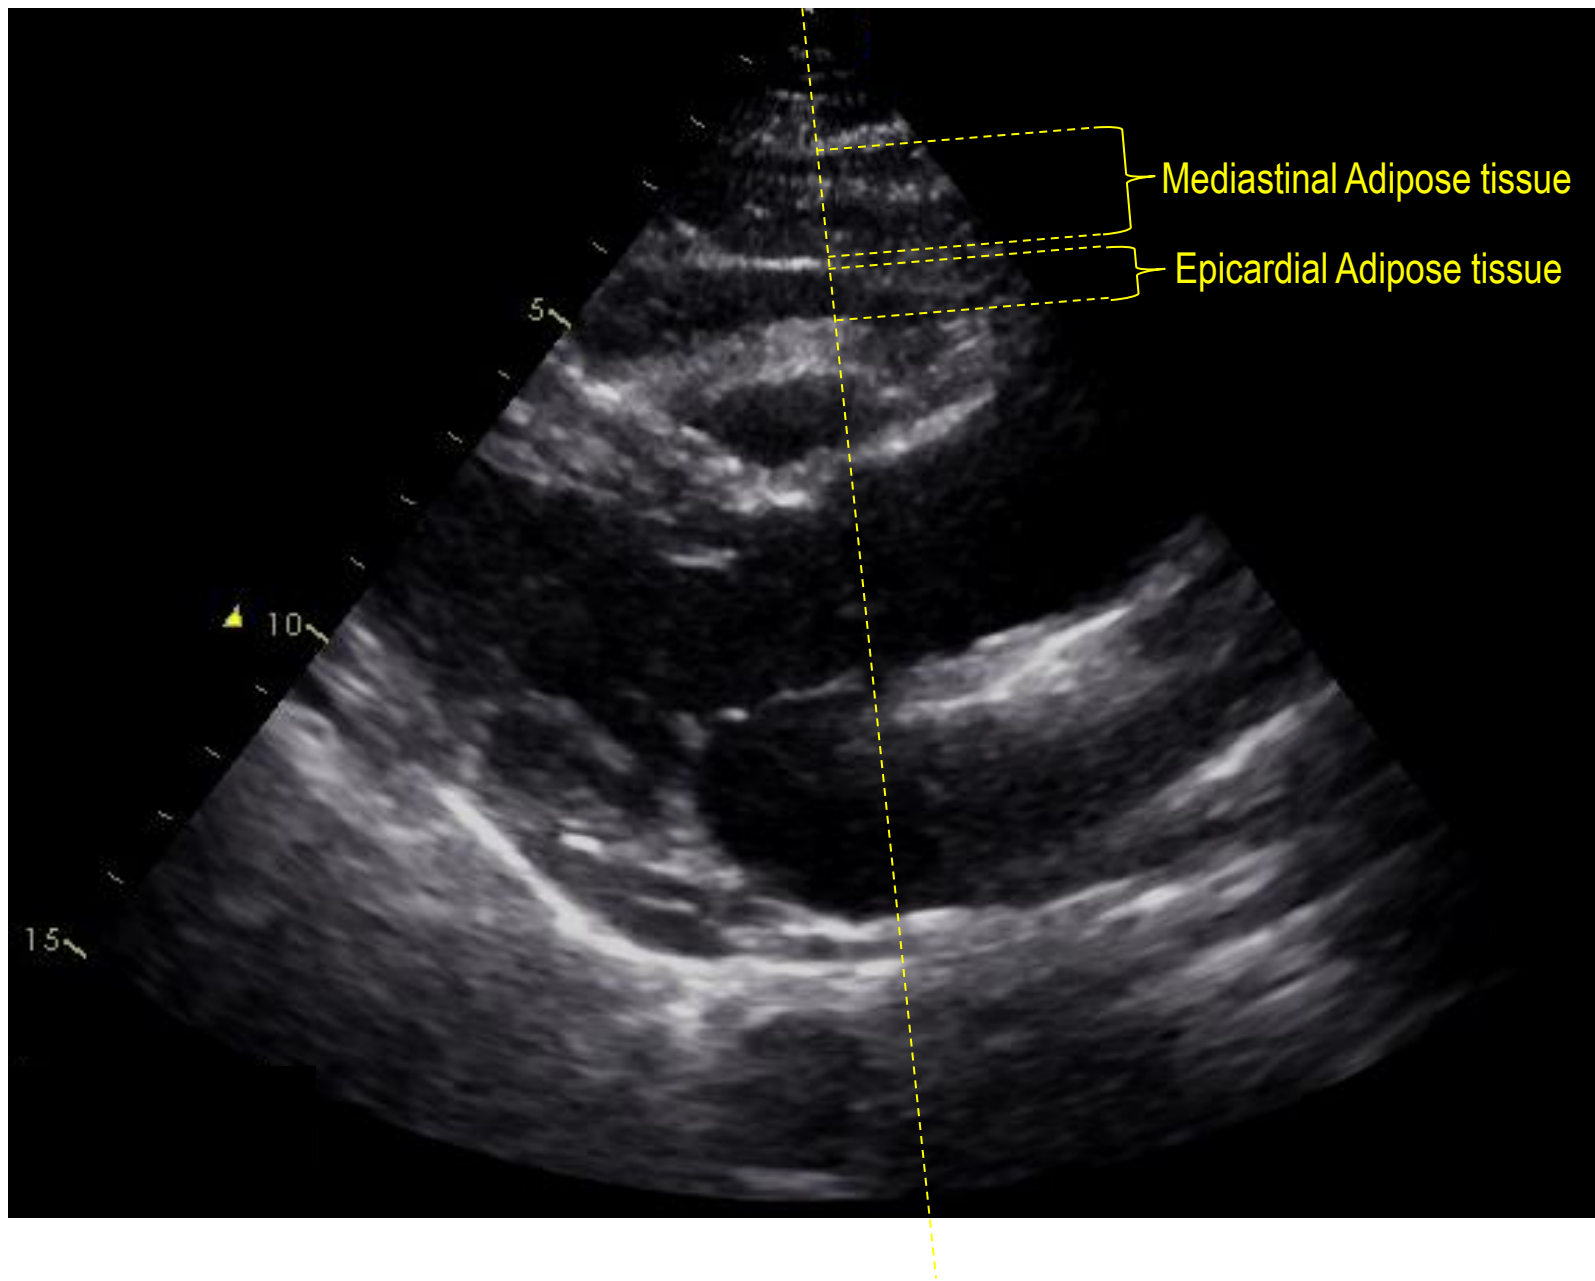

Figure S3

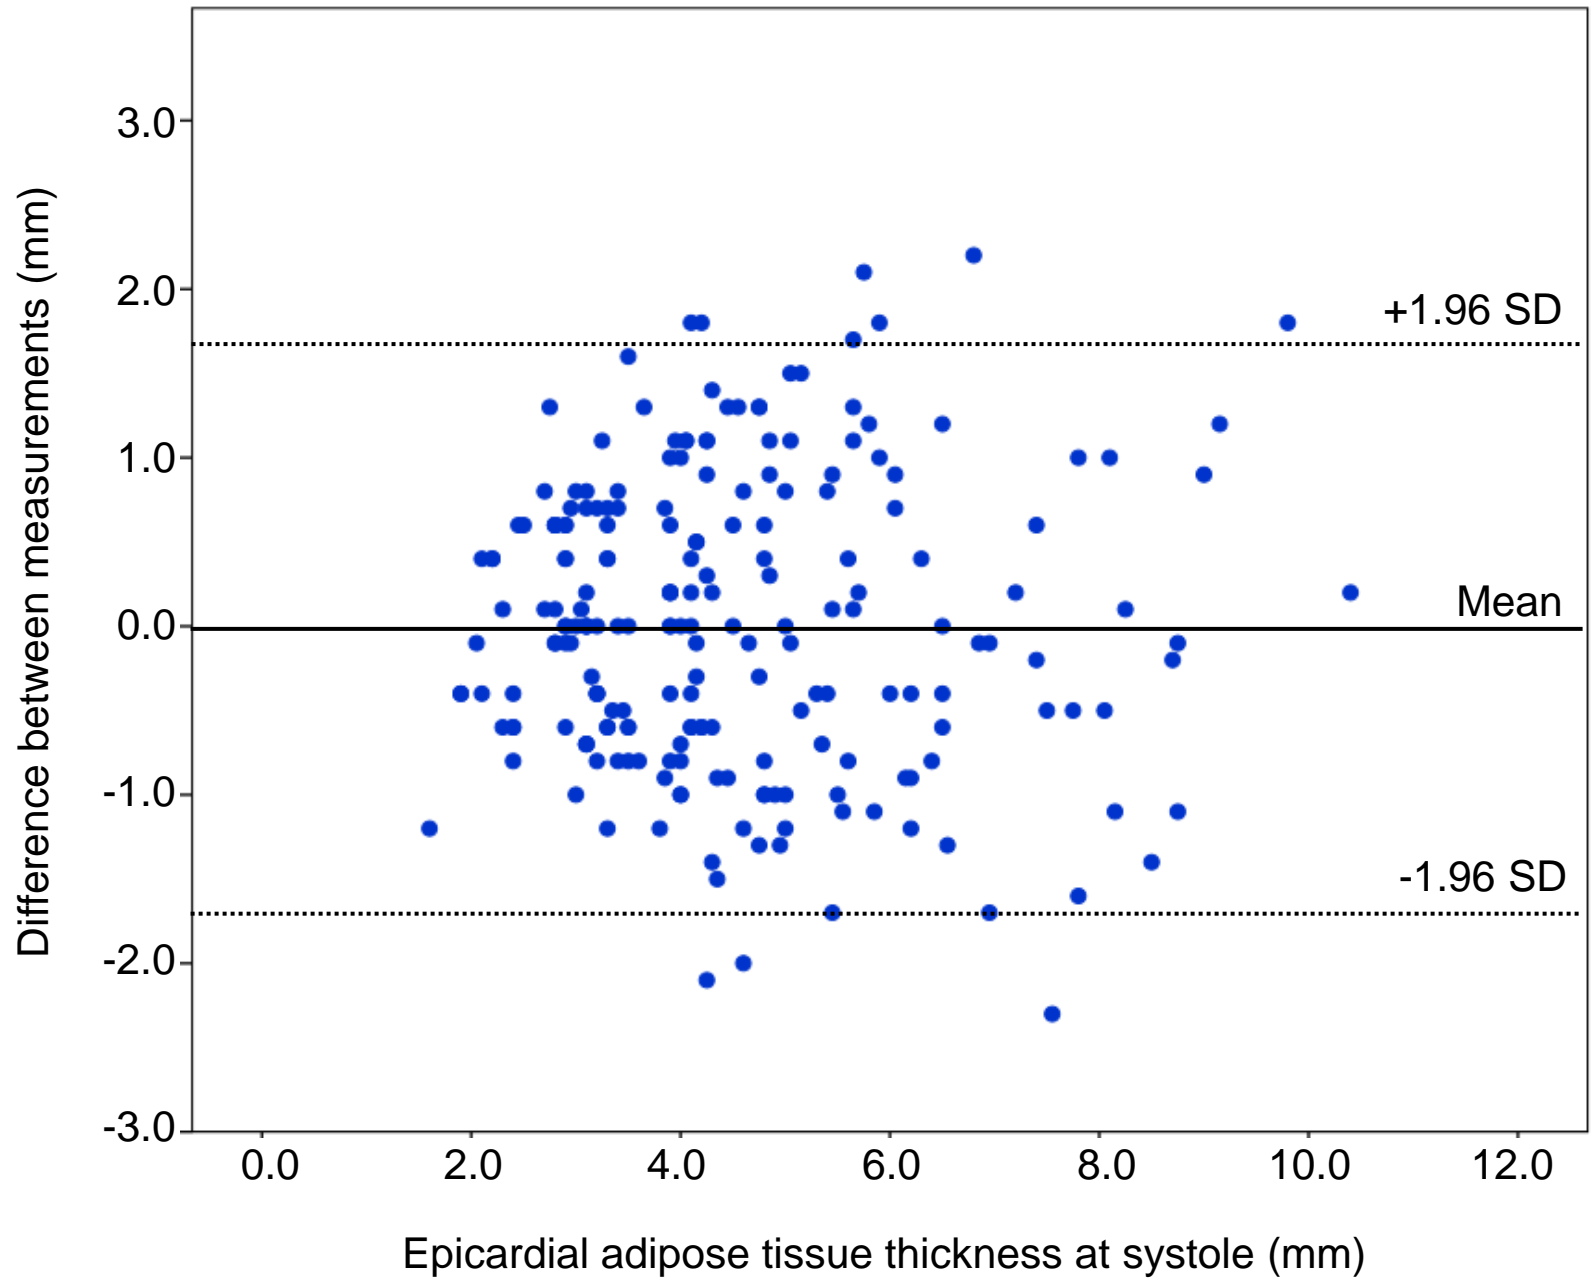

Figure S4

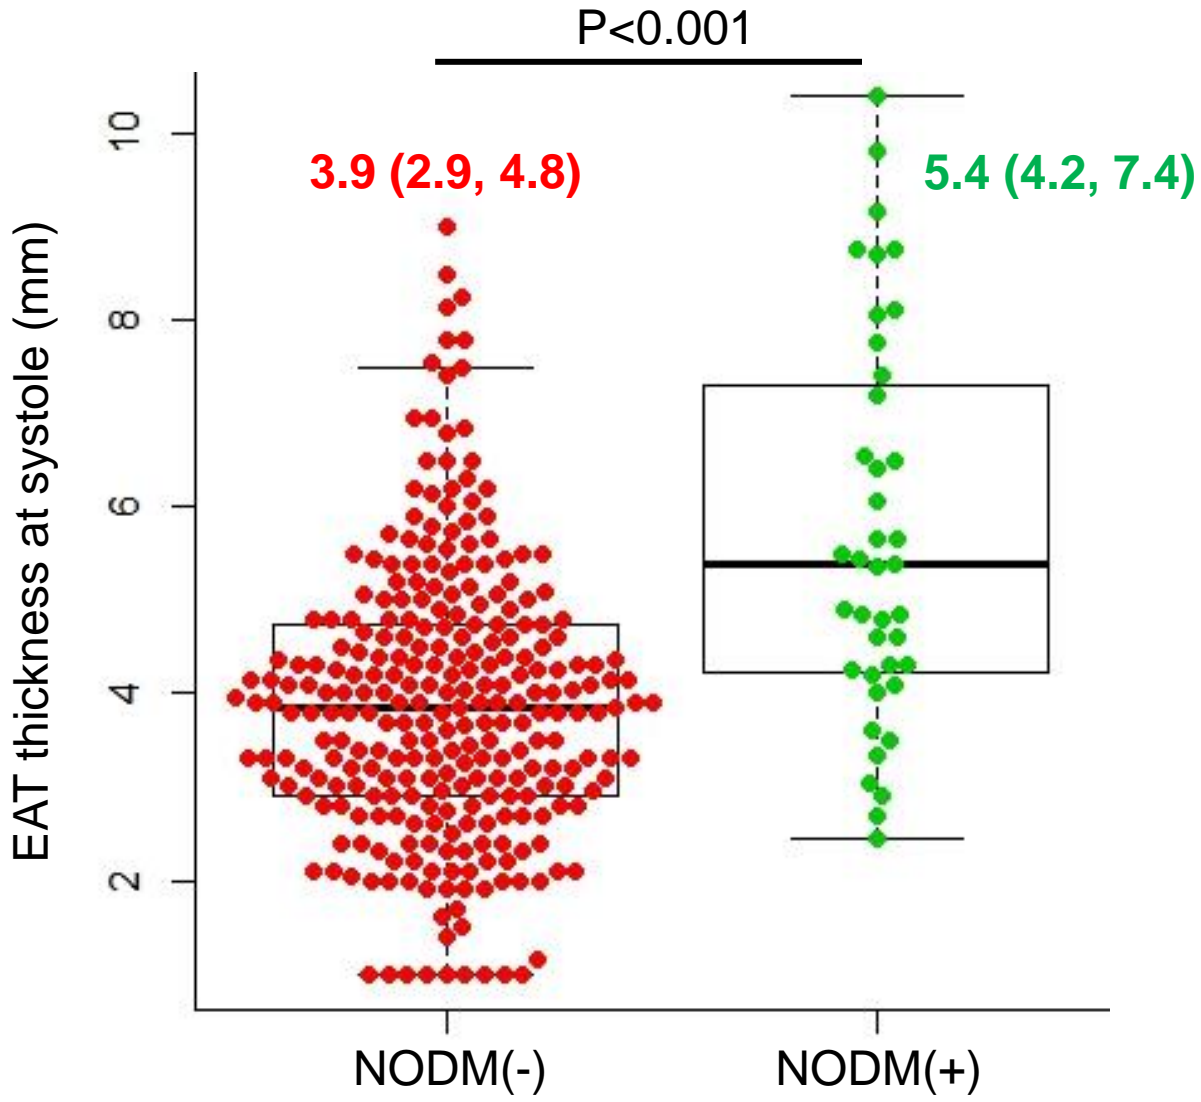

Figure S5

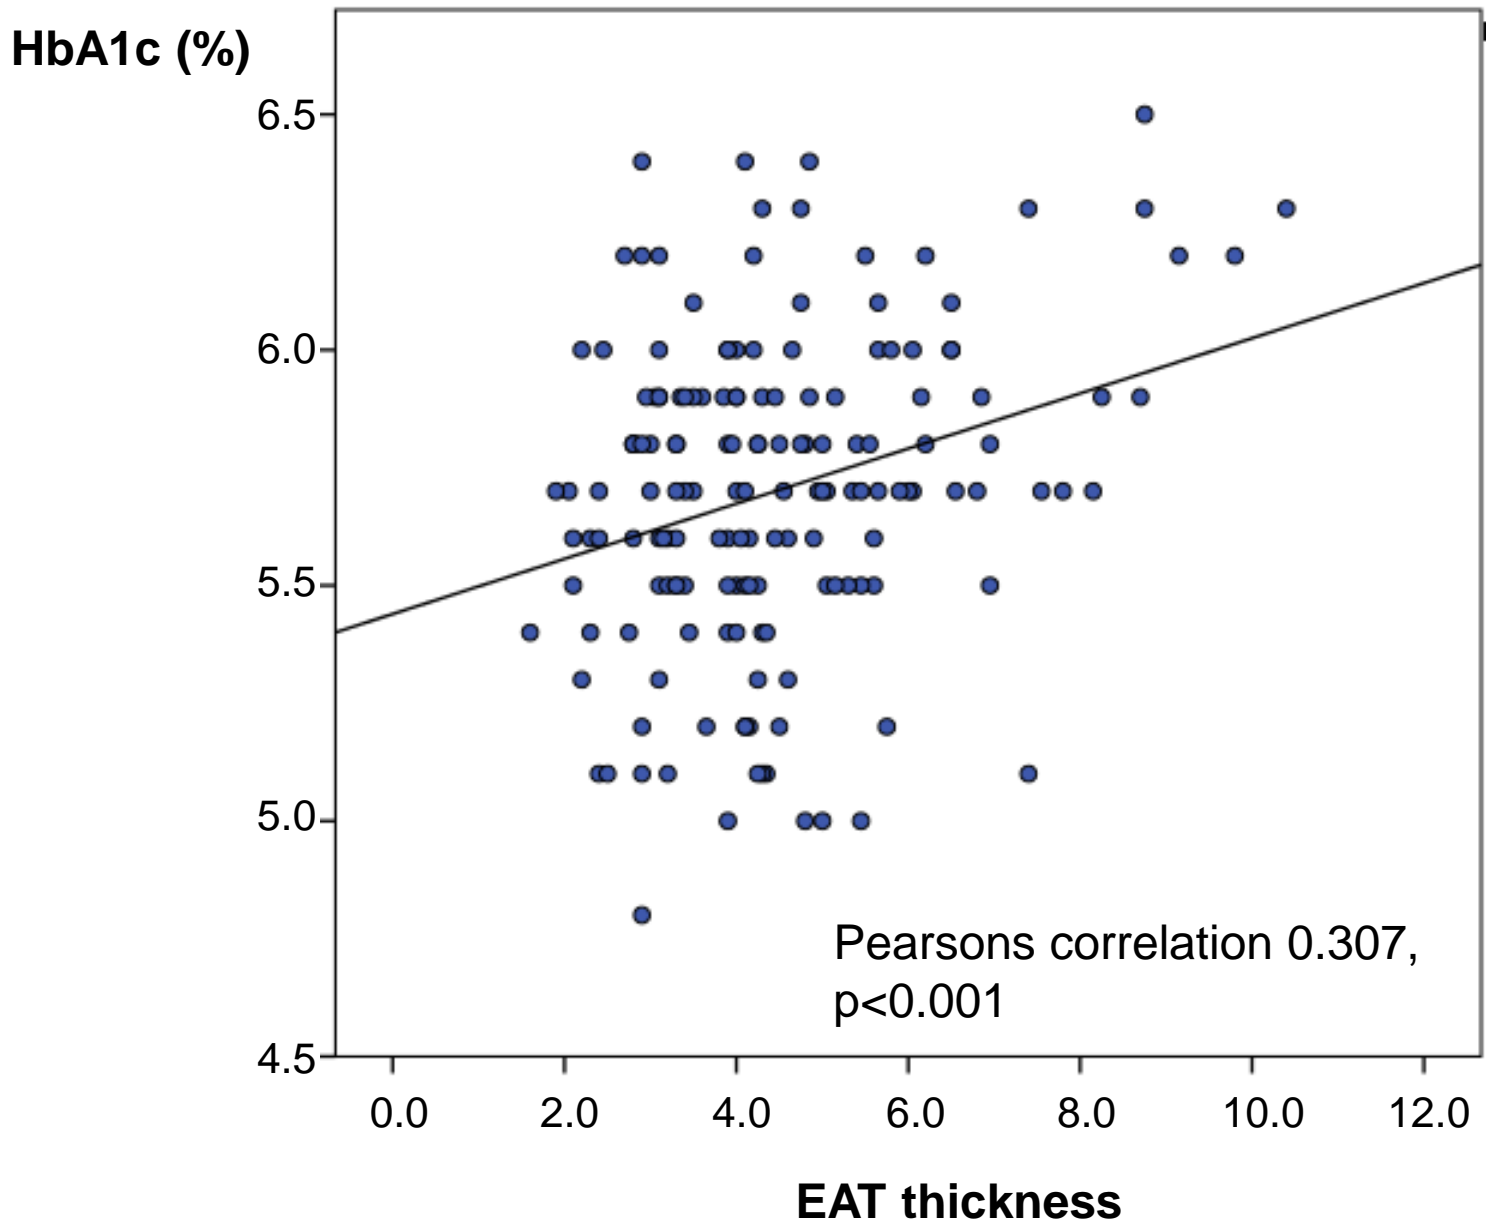

Supplement: MOESM1 [file 15359314]
